# Supplementary material
Source: PubMed Central journal article supplement (PMC10309659)
Supplement: NIHMS1895075-supplement-Supplementary_Online_Content.pdf [file NIHMS1895075-supplement-Supplementary_Online_Content.pdf]

## Supplementary Online Content

Mitchell AP, Rotter JS, Patel E, et al. Association between reimbursement incentives and physician practice in oncology: a systematic review. *JAMA Oncol*. Published online January 3, 2019. doi:10.1001/jamaoncol.2018.6196

**eAppendix.** Search Terms

**eMethods.** Risk of Bias Assessment

**eTable 1.** Studies Excluded at Full Text Review

**eTable 2.** Study Results

**eTable 3.** Study Results for Studies With Critical Risk of Bias

**eFigure 1.** PRISMA Diagram

**eFigure 2.** Risk of Bias Assessment for Studies With Critical Risk of Bias

**eReferences.**

This supplementary material has been provided by the authors to give readers additional information about their work.

## **eAppendix. Search Terms**

### Pubmed/MEDLINE:

(fees and charges[mesh] OR "Reimbursement, Incentive"[Mesh] OR "Physician Incentive Plans"[Mesh] OR reimburs\*[tiab] OR capitation fee[mesh] OR incentive\*[tiab] OR "pay for performance" OR "incentive reimbursement" OR "incentive reimbursements" OR "fee-for-service" OR "fee for service" OR fee for service plans[mesh] OR unnecessary procedures[mesh] OR physician self-referral[mesh] OR capitation[tiab] OR reimbursement mechanisms[mesh] OR insurance claim review[mesh]) AND (provider\* OR physician\* OR physicians[mesh] OR practice patterns, physicians'[mesh] OR physician's role[mesh] OR oncolog\*[tiab]) NOT (comment[pt] OR letter[pt]) AND (oncology[mesh] OR cancer[mesh] OR chemotherapy[mesh] OR antineoplastic[mesh] OR cancer\*[tiab] OR neoplas\*[tiab] OR oncol\*[tiab] OR antineoplas\*[tiab] OR chemotherap\*[tiab])

### Web of Science:

("fees and charges" OR "Reimbursement, Incentive" OR "reimbursement incentive" OR "Physician Incentive Plans" OR "physician reimbursement" OR reimburs\* OR "capitation fee" OR incentive\* OR "pay for performance" OR "incentive reimbursement" OR "incentive reimbursements" OR "fee-for-service" OR "fee for service plans" OR "unnecessary procedures" OR "self-referral" OR capitation OR "reimbursement mechanisms" OR "insurance claim review" OR billing OR "fee schedule" OR "buy and bill" OR "financial incentive" OR "payment reform") AND (provider\* OR physician\* OR physicians OR "practice patterns, physicians" OR "physician's role") AND (cancer\* OR neoplas\* OR oncol\* OR antineoplas\* OR chemotherap\*)

### Proquest Health Management:

("fees and charges" OR "Reimbursement, Incentive" OR "reimbursement incentive" OR "Physician Incentive Plans" OR "physician reimbursement" OR reimburs\* OR "capitation fee" OR incentive\* OR "pay for performance" OR "incentive reimbursement" OR "fee-for-service" OR "fee for service plans" OR "unnecessary procedures" OR "self-referral" OR capitation OR "reimbursement mechanisms" OR "insurance claim review" OR billing OR "fee schedule" OR "buy and bill" OR "financial incentive" OR "payment reform" OR "physician compensation") AND ti(cancer\* OR neoplas\* OR oncol\* OR antineoplas\* OR chemotherap\*)

### Econlit and Business Source Premier:

("medical fees" OR "medicare reimbursement" OR "fees and charges" OR "Reimbursement, Incentive" OR "reimbursement incentive" OR "Physician Incentive Plans" OR "physician reimbursement" OR reimburs\* OR "capitation fee" OR incentive\* OR "pay for performance" OR "incentive reimbursement" OR "fee-for-service" OR "fee for service plans" OR "unnecessary procedures" OR "self-referral" OR capitation OR "reimbursement mechanisms" OR "insurance claim review" OR billing OR "fee schedule" OR "buy and bill" OR "financial incentive" OR "payment reform" OR "physician compensation" OR "reimbursement policy") AND ti(cancer\* OR neoplas\* OR oncol\* OR antineoplas\* OR chemotherap\*)

## **eMethods. Risk of Bias Assessment**

We applied the Risk of Bias in Non-randomized Studies (ROBINS-I) tool to assess risk of bias<sup>1</sup>. This tool assesses risk of bias across several different domains. For each domain, a judgement is made as to whether there may have been risk of bias due to that domain, using the following definitions:

Low risk of bias: the study is comparable to a well-performed randomized trial

Moderate risk of bias: the study provides sound evidence for a non-randomized study but cannot be considered comparable to a well-performed randomized trial

High risk of bias: the study has some important problems

Critical risk of bias: the study is too problematic to provide any useful evidence and should not be included in any synthesis

Unclear risk of bias: No information on which to base a judgement about risk of bias

The authors of the ROBINS-I tool note that all non-randomized trials are anticipated to have at least a moderate risk of bias in the domain of risk of bias due to confounding.

The following is a brief, abridged summary of the factors ROBINS-I users are asked to consider in rendering a judgement for each domain:

Bias due to confounding: whether study authors appropriately controlled for all confounding factors, and whether confounding factors were measured validly and reliably.

Bias due to selection of participants into study: whether participants were selected based on characteristics observed after the intervention period began.

Bias due to classification of interventions: whether intervention groups were clearly defined, and whether knowledge of an individual's outcome may have affected the intervention group classification.

Bias due to deviations from intended interventions: whether deviations from the intended interventions occurred, whether such deviations occurred in an unbalanced fashion, whether deviations were likely to have affected the outcome, and whether participants adhered to the assigned intervention.

Bias due to missing data: whether missingness occurred, whether missingness resulted in participant exclusion, and whether missingness was similar between intervention groups.

Bias in measurement of outcomes: whether the outcome measure may have been influenced by knowledge of intervention group assignment, and whether methods of outcome assessment or errors in outcome assessment were likely to be balanced between intervention groups

Bias in selection of the reported result: whether the study's reported result may have been selectively chosen from among several different analyses, or from among one subgroup within a larger cohort.

**eTable 1.** Studies Excluded at Full Text Review. For each study, “reason for exclusion” identifies which of the specific exclusion criterion was cited. “Further explanation” provides additional context about the study that resulted in exclusion for that reason.

| <b>Lead author and year of publication</b> | <b>Reason for Exclusion</b>                                                         | <b>Further explanation</b>                                                                                                                              |
|--------------------------------------------|-------------------------------------------------------------------------------------|---------------------------------------------------------------------------------------------------------------------------------------------------------|
| Ata, 2013 <sup>2</sup>                     | Study did not contain an empirical analysis                                         | Theoretical/simulation model                                                                                                                            |
| Bennett, 1999 <sup>3</sup>                 | Outcome not measured directly                                                       | Study outcome was measured through a survey of providers                                                                                                |
| Bennett, 2000 <sup>4</sup>                 | Wrong study design                                                                  | Book chapter                                                                                                                                            |
| Colla, 2012 <sup>5</sup>                   | Duplicate                                                                           | This study was included in the final analysis, but was duplicated in our search                                                                         |
| Ellis, 2013 <sup>6</sup>                   | Not peer reviewed                                                                   | Dissertation                                                                                                                                            |
| Halpern, 2017 <sup>7</sup>                 | Study did not focus on cancer patients                                              |                                                                                                                                                         |
| Hemani, 2010 <sup>8</sup>                  | Study did not contain a measure of contrast between groups of interest              | Trends in utilization for both the experimental and control groups are described, but there is no statistical measure of comparison                     |
| Herman, 2003 <sup>9</sup>                  | Outcome was not a form of patient care delivery                                     | Outcome was the cost and spending on various radiation oncology procedures                                                                              |
| Makarov, 2016 <sup>10</sup>                | Reimbursement not identified as the main difference between exposure/control groups | Exposure and control groups were treated in different health care systems                                                                               |
| McKoy, 2008 <sup>11</sup>                  | Wrong study design                                                                  | Book chapter                                                                                                                                            |
| Millman, 1989 <sup>12</sup>                | Wrong study design                                                                  | Opinion/editorial                                                                                                                                       |
| Newcomer, 2014 <sup>13</sup>               | Outcome was not a form of patient care delivery                                     | The outcome was health care spending, not delivery of any specific service                                                                              |
| O’Shaughnessy, 2013 <sup>14</sup>          | Study did not contain a measure of contrast between groups of interest              | Study describes changing use of androgen deprivation therapy over time, but does not test a specific hypothesis                                         |
| Ramsey, 2015 <sup>15</sup>                 | Study did not contain a measure of contrast between groups of interest              | Study describes the delivery of several low-value forms of cancer care, but does not assess delivery with respect to any specific reimbursement changes |
| Retchin, 1997 <sup>16</sup>                | Reimbursement not identified as the main difference between exposure/control groups | Exposure and control groups were treated in different health care systems                                                                               |
| Shahinian, 2017 <sup>17</sup>              | Study did not contain a measure of contrast between groups of interest              | Trends in utilization for both the experimental and control groups are described, but there is no statistical measure of comparison                     |

|                              |                                                                        |                                                                                                                 |
|------------------------------|------------------------------------------------------------------------|-----------------------------------------------------------------------------------------------------------------|
| Shen, 2014 <sup>18</sup>     | Study did not contain a measure of contrast between groups of interest | Study describes changing use of radiation therapy over time, but does not test a specific hypothesis            |
| Soumerai, 1990 <sup>19</sup> | Study did not focus on cancer patients                                 |                                                                                                                 |
| Jacobson, 2006 <sup>20</sup> | Duplicate                                                              | This study was included in the final analysis, but was duplicated in our search                                 |
| Weight, 2008 <sup>21</sup>   | Study did not contain a measure of contrast between groups of interest | Study describes changing use of androgen deprivation therapy over time, but does not test a specific hypothesis |

**eTable 2:** Study Results. Studies were grouped in to three subject areas: 1) studies evaluating the effect of reimbursement differences created by inter-provider or inter-treatment variability in reimbursement, 2) studies of reimbursement incentives resulting from physician ownership and/or self-referral practices, and 3) studies evaluating the effect of changes in reimbursement for oncology treatment services over time. “Direction of association between financial incentives and care delivery” describes whether the measured association was in the direction hypothesized by the study authors under the assumption of physician responsiveness to financial incentives (“In hypothesized direction”), in the direction counter to the hypothesis (“Contrary to hypothesized direction”), or in neither direction (“no association”).

| Lead author and year of publication                                              | Study design, time period, and patient population                                                                   | Financial incentive studied, and analytic question                                                                                                         | Exposure and control groups                                                                                                                                                 | Primary outcome[s]                                                                                                        | Result and measure of confidence | Direction of association between financial incentives and care delivery |
|----------------------------------------------------------------------------------|---------------------------------------------------------------------------------------------------------------------|------------------------------------------------------------------------------------------------------------------------------------------------------------|-----------------------------------------------------------------------------------------------------------------------------------------------------------------------------|---------------------------------------------------------------------------------------------------------------------------|----------------------------------|-------------------------------------------------------------------------|
| <b>Studies of inter-provider or inter-treatment variability in reimbursement</b> |                                                                                                                     |                                                                                                                                                            |                                                                                                                                                                             |                                                                                                                           |                                  |                                                                         |
| Hadley, 2003 <sup>22</sup>                                                       | Retrospective cross-sectional analysis, 1994<br>Patients receiving surgical treatment for breast cancer (N = 1,787) | Variation in Medicare fees for breast conserving surgery (BCS) and mastectomy (MST)<br>Do physicians with higher Medicare fees for BCS use BCS more often? | Patients treated by physicians with higher Medicare fees for BCS fees (or lower MST fees), compared to those treated by physicians with lower BCS fees (or higher MST fees) | Change in the likelihood of patient receiving BCS+RT instead of MST, associated with a 10% increase in physician BCS fees | OR = 1.34 (p = 0.02)             | In hypothesized direction                                               |
|                                                                                  |                                                                                                                     |                                                                                                                                                            |                                                                                                                                                                             | Change in the likelihood of patient receiving BCS instead of MST, associated with a 10% increase in physician BCS fees    | OR = 1.23 (p = 0.23)             | In hypothesized direction                                               |
|                                                                                  |                                                                                                                     |                                                                                                                                                            |                                                                                                                                                                             | Change in the likelihood of patient receiving BCS+RT instead of                                                           | OR = 1.86 (p < 0.01)             | In hypothesized direction                                               |

|                                |                                                                                                                               |                                                                                                                                                                                                                                                 |                                                                                                                                    |                                                                                                                        |                                   |                                    |
|--------------------------------|-------------------------------------------------------------------------------------------------------------------------------|-------------------------------------------------------------------------------------------------------------------------------------------------------------------------------------------------------------------------------------------------|------------------------------------------------------------------------------------------------------------------------------------|------------------------------------------------------------------------------------------------------------------------|-----------------------------------|------------------------------------|
|                                |                                                                                                                               |                                                                                                                                                                                                                                                 |                                                                                                                                    | MST, associated with a 10% decrease in physician MST fees                                                              |                                   |                                    |
|                                |                                                                                                                               |                                                                                                                                                                                                                                                 |                                                                                                                                    | Change in the likelihood of patient receiving BCS instead of MST, associated with a 10% decrease in physician MST fees | OR = 1.46 (p = 0.23)              | In hypothesized direction          |
| Jacobson, 2006 <sup>20,a</sup> | Retrospective cohort, 1995-1998<br>Patients with metastatic breast, colon, other gastrointestinal, or lung cancer (N = 2,246) | Differences in Medicare reimbursement for chemotherapy based on local carrier payment rates.<br>Are physicians who are reimbursed more generously for chemotherapy more likely to use chemotherapy, or do they use more expensive chemotherapy? | Patients treated by physicians with higher Medicare fees for chemotherapy, compared to those treated by physicians with lower fees | Receipt of chemotherapy for breast cancer associated with 1SD greater physician reimbursement                          | PD = 1.1% (95%CI -0.9%, 3.1%)     | In hypothesized direction          |
|                                |                                                                                                                               |                                                                                                                                                                                                                                                 |                                                                                                                                    | Change in cost of breast cancer chemotherapy associated with \$1 greater physician reimbursement                       | +\$23.10 (p = 0.038)              | In hypothesized direction          |
|                                |                                                                                                                               |                                                                                                                                                                                                                                                 |                                                                                                                                    | Receipt of chemotherapy for colorectal cancer associated with 1SD greater physician reimbursement                      | PD = -15.0% (95%CI -42.2%, 12.2%) | Contrary to hypothesized direction |
|                                |                                                                                                                               |                                                                                                                                                                                                                                                 |                                                                                                                                    | Change in cost of colorectal cancer chemotherapy associated with \$1 greater physician reimbursement                   | +\$35.50 (p = 0.079)              | In hypothesized direction          |

|                             |                                                                                                  |                                                                                                                                                                                             |                                                                            |                                                                                                                                                 |                                 |                                    |
|-----------------------------|--------------------------------------------------------------------------------------------------|---------------------------------------------------------------------------------------------------------------------------------------------------------------------------------------------|----------------------------------------------------------------------------|-------------------------------------------------------------------------------------------------------------------------------------------------|---------------------------------|------------------------------------|
|                             |                                                                                                  |                                                                                                                                                                                             |                                                                            | Receipt of chemotherapy for GI cancer associated with 1SD greater physician reimbursement                                                       | PD = -2.5% (95%CI -6.3%, 1.3%)  | Contrary to hypothesized direction |
|                             |                                                                                                  |                                                                                                                                                                                             |                                                                            | Change in cost of GI cancer chemotherapy associated with \$1 greater physician reimbursement                                                    | -\$6.33 (p = 0.038)             | Contrary to hypothesized direction |
|                             |                                                                                                  |                                                                                                                                                                                             |                                                                            | Receipt of chemotherapy for lung cancer associated with 1SD greater physician reimbursement                                                     | PD = -0.1% (95% CI -2.0%, 1.9%) | Contrary to hypothesized direction |
|                             |                                                                                                  |                                                                                                                                                                                             |                                                                            | Change in cost of lung cancer chemotherapy associated with \$1 greater physician reimbursement                                                  | +\$13.00 (p = 0.039)            | In hypothesized direction          |
| Epstein, 2012 <sup>23</sup> | Retrospective cohort, 1992-2002<br>Patients receiving chemotherapy for breast cancer (N = 3,856) | Physician use of chemotherapy drugs with respect to profit margin.<br>Are physicians more likely to use chemotherapy drugs with higher profit margins over those with lower profit margins? | N/A: physician use of chemotherapy drugs was analyzed across entire cohort | Change in likelihood of physician selection of a chemotherapy drug associated with a 1% increase in the profit margin of the average daily dose | +1.1% to +17.7% <sup>b</sup>    | In hypothesized direction          |



|                                                                             |                                                                                                                              |                                                                                                                                                                                                                                                                                            |                                                                                                                                                                                                         |                                                                                                                     |                                   |                                        |
|-----------------------------------------------------------------------------|------------------------------------------------------------------------------------------------------------------------------|--------------------------------------------------------------------------------------------------------------------------------------------------------------------------------------------------------------------------------------------------------------------------------------------|---------------------------------------------------------------------------------------------------------------------------------------------------------------------------------------------------------|---------------------------------------------------------------------------------------------------------------------|-----------------------------------|----------------------------------------|
| Ellis, 2016 <sup>24</sup>                                                   | Retrospective cohort, 2000-2003<br>Patients with prostate cancer (N = 15,128)                                                | Differences in Medicare reimbursement for ADT based on local carrier payment rates.<br>Are physicians who are reimbursed more generously for ADT more likely to use ADT?                                                                                                                   | Patients treated by physicians with higher Medicare fees for ADT, compared to those treated by physicians with lower fees                                                                               | Change in the likelihood of patient receiving ADT associated with a \$1 increase in physician reimbursement for ADT | OR = 1.00 (95%CI 1.00, 1.00)      | No association                         |
| Jung, 2018 <sup>25,a</sup>                                                  | Retrospective cohort, 2010-2013<br>Cancer treatment in hospitals participating in the 340B drug discount program (N = 9,062) | Access to 340B discount pricing, vs. no 340B discount pricing.<br>Are patients treated by health systems participating in the 340B discount program more likely to receive chemotherapy, or more likely to receive chemotherapy in the hospital outpatient setting vs. the office setting? | Medicare patients treated in HRRs that gained a 340B hospital during the study period, compared to those treated in HRRs without 340B hospitals                                                         | Change in the likelihood of receiving chemotherapy                                                                  | PD = 0.49% (95% CI -0.29%, 1.27%) | In hypothesized direction              |
|                                                                             |                                                                                                                              |                                                                                                                                                                                                                                                                                            |                                                                                                                                                                                                         | Change in the likelihood of receiving chemotherapy in the hospital outpatient setting (vs. the office setting)      | PD = 7.76% (95% CI 2.66, 12.56)   | In hypothesized direction              |
|                                                                             |                                                                                                                              |                                                                                                                                                                                                                                                                                            |                                                                                                                                                                                                         | Change in the number of chemotherapy drug claims                                                                    | PD = 0.04% (95% CI -0.67, 0.75)   | In hypothesized direction              |
| <b>Studies of physician ownership interests and self-referral practices</b> |                                                                                                                              |                                                                                                                                                                                                                                                                                            |                                                                                                                                                                                                         |                                                                                                                     |                                   |                                        |
| Mitchell, 1992 <sup>26</sup>                                                | Cross-sectional market share, 1989<br>Patients receiving radiation therapy (N = N/A)                                         | Physician self-referral for radiation therapy<br>Do physicians use radiation therapy more often when self-referring for services?                                                                                                                                                          | Patients treated in free-standing radiation centers in the state of Florida (likely to be self-referring), compared to those treated in the rest of the United States (not likely to be self-referring) | Number of treatments per 1,000 Medicare beneficiaries                                                               | RR = 1.58                         | In hypothesized direction <sup>c</sup> |
|                                                                             |                                                                                                                              |                                                                                                                                                                                                                                                                                            |                                                                                                                                                                                                         | Allowed charges per 1,000 Medicare beneficiaries                                                                    | RR = 1.46                         | In hypothesized direction <sup>c</sup> |
| Smith, 2011 <sup>27</sup>                                                   | Retrospective cohort, 2001-2005                                                                                              | Office-based radiation centers vs. hospital-based                                                                                                                                                                                                                                          | Patients treated with RT in freestanding radiation centers, compared to those                                                                                                                           | Likelihood of receiving IMRT                                                                                        | OR = 1.36 (95%CI 1.20, 1.53)      | In hypothesized direction              |

|                              |                                                                               |                                                                                                                                                                                                                                                                         |                                                                                                                                                                                                                                           |                                              |                                                                                                 |                           |
|------------------------------|-------------------------------------------------------------------------------|-------------------------------------------------------------------------------------------------------------------------------------------------------------------------------------------------------------------------------------------------------------------------|-------------------------------------------------------------------------------------------------------------------------------------------------------------------------------------------------------------------------------------------|----------------------------------------------|-------------------------------------------------------------------------------------------------|---------------------------|
|                              | Patients receiving radiation therapy for breast cancer (N = 26,163)           | Are office-based radiation centers, which are more often self-referring, more likely to use IMRT?                                                                                                                                                                       | treated in hospital-based outpatient centers                                                                                                                                                                                              |                                              |                                                                                                 |                           |
| Bekelman, 2013 <sup>28</sup> | Retrospective cohort, 2004-2007<br>Patients with prostate cancer (N = 3,980)  | Prostate cancer treatment before and after conversion of a urology practice to an integrated prostate cancer center (IPCC), exempt from Stark Law. Are IPCCs more or less likely to treat patients with IMRT, ADT, prostatectomy, non-IMRT RT, or expectant management? | Patients treated in a urology practice after vs. before transition to an IPCC, compared to those treated in non-IPCC practices elsewhere within the same HRR, and to those treated in non-IPCC practices elsewhere within the same state. | Likelihood of receiving IMRT                 | PD = 11.7% (95%CI 3.9%, 19.2%) vs. state control, 10.5% (95%CI 0.9, 20.7%) vs HRR control       | In hypothesized direction |
|                              |                                                                               |                                                                                                                                                                                                                                                                         |                                                                                                                                                                                                                                           | Likelihood of receiving ADT                  | PD = -5.3% (95%CI -12.1%, 1.3%) vs state control, -7.5% (95%CI -16.7%, 0.5%) vs HRR control     | In hypothesized direction |
|                              |                                                                               |                                                                                                                                                                                                                                                                         |                                                                                                                                                                                                                                           | Likelihood of receiving prostatectomy        | PD = -12.9% (95%CI -23.5%, -1.9%) vs state control, -12.0% (95%CI -19.4%, -5.2%) vs HRR control | In hypothesized direction |
|                              |                                                                               |                                                                                                                                                                                                                                                                         |                                                                                                                                                                                                                                           | Likelihood of receiving non-IMRT RT          | NR                                                                                              | NR                        |
|                              |                                                                               |                                                                                                                                                                                                                                                                         |                                                                                                                                                                                                                                           | Likelihood of receiving expectant management | NR                                                                                              | NR                        |
| Mitchell, 2013 <sup>29</sup> | Retrospective cohort, 2005-2010<br>Patients with prostate cancer (N = 38,765) | Prostate cancer treatment before vs. after private-practice urology groups became self-referring, compared to urology groups that did not become self-referring. Are self-referring urology practices more or less likely to treat patients with IMRT?                  | Patients treated in private-practice urology practices after vs. before self-referral period, compared to similar practices that did not become self-referring                                                                            | Likelihood of receiving IMRT                 | PD = 16.9% (p < 0.0001)<br>OR = 2.79 (95%CI 2.53, 3.08)                                         | In hypothesized direction |

|                                                                            |                                                                               |                                                                                                                                                                                                                        |                                                                                                                                                                                                                                                                                                 |                                                                                 |                                 |                           |
|----------------------------------------------------------------------------|-------------------------------------------------------------------------------|------------------------------------------------------------------------------------------------------------------------------------------------------------------------------------------------------------------------|-------------------------------------------------------------------------------------------------------------------------------------------------------------------------------------------------------------------------------------------------------------------------------------------------|---------------------------------------------------------------------------------|---------------------------------|---------------------------|
| Williams, 2017 <sup>30</sup>                                               | Retrospective cohort, 2004-2009<br>Patients with prostate cancer (N = 17,982) | Prostate cancer treatment in older men in self-referring vs. non-self-referring urology practices.<br>Are self-referring urology practices more or less likely to treat older men with any active therapy, or with RT? | Patients diagnosed in self-referring urology practices, compared to those diagnosed in non-self-referring urology practices.                                                                                                                                                                    | Likelihood of receiving active therapy (prostatectomy, RT, cryotherapy, or ADT) | OR = 1.61 (95%CI 1.30, 2.00)    | In hypothesized direction |
|                                                                            |                                                                               |                                                                                                                                                                                                                        |                                                                                                                                                                                                                                                                                                 | Likelihood of receiving external beam RT                                        | OR = 1.59 (95%CI 1.37, 1.84)    | In hypothesized direction |
| <b>Studies of changes in reimbursement for oncology services over time</b> |                                                                               |                                                                                                                                                                                                                        |                                                                                                                                                                                                                                                                                                 |                                                                                 |                                 |                           |
| Elliott, 2010 <sup>31</sup>                                                | Retrospective cohort, 1992-2005<br>Patients with prostate cancer (N = 72,818) | Decrease in reimbursement for ADT, following the Medicare Modernization Act<br>Did physicians decrease use of ADT in response to lower reimbursement?                                                                  | Men newly diagnosed with prostate cancer after a decrease in reimbursement for ADT, compared to those diagnosed before the decrease. Specific groups compared included men with metastatic disease (for which ADT is indicated) and low-risk localized disease (for which ADT is not indicated) | Likelihood of receiving ADT, for men with metastatic disease                    | OR = 0.9 (95%CI 0.68, 1.18)     | N/A (control)             |
|                                                                            |                                                                               |                                                                                                                                                                                                                        |                                                                                                                                                                                                                                                                                                 | Likelihood of receiving ADT, for men with low-risk localized disease            | OR = 0.61 (95%CI 0.53, 0.71)    | In hypothesized direction |
| Jacobson, 2010 <sup>32,a</sup>                                             | Retrospective cohort, 2003-2005<br>Patients with lung cancer (N = 222,478)    | Decrease in reimbursement for some chemotherapy drugs, following the Medicare Modernization Act<br>Did physicians decrease use of chemotherapy drugs in response to lower reimbursement?                               | Patients diagnosed with lung cancer after a decrease in reimbursement for some chemotherapy drugs, compared to those diagnosed before the decrease                                                                                                                                              | Likelihood of receiving any chemotherapy                                        | PD = 1.9% (95%CI 1.51%, 2.29%)  | In hypothesized direction |
|                                                                            |                                                                               |                                                                                                                                                                                                                        |                                                                                                                                                                                                                                                                                                 | Likelihood of receiving carboplatin                                             | PD = -4.1% (95%CI -4.1%, -2.1%) | In hypothesized direction |
|                                                                            |                                                                               |                                                                                                                                                                                                                        |                                                                                                                                                                                                                                                                                                 | Likelihood of receiving paclitaxel                                              | PD = -4.3% (95%CI -6.3%, -2.3%) | In hypothesized direction |
|                                                                            |                                                                               |                                                                                                                                                                                                                        |                                                                                                                                                                                                                                                                                                 | Likelihood of receiving docetaxel                                               | PD = 0.5% (95%CI -0.9%, 1.9%)   | NA (control)              |

|                              |                                                                                                |                                                                                                                                                                                                                  |                                                                                                                                                    |                                                                                                  |                                                                                        |                           |
|------------------------------|------------------------------------------------------------------------------------------------|------------------------------------------------------------------------------------------------------------------------------------------------------------------------------------------------------------------|----------------------------------------------------------------------------------------------------------------------------------------------------|--------------------------------------------------------------------------------------------------|----------------------------------------------------------------------------------------|---------------------------|
|                              |                                                                                                |                                                                                                                                                                                                                  |                                                                                                                                                    | Likelihood of receiving etoposide                                                                | PD = -1.2% (95%CI -2.0%, -0.4%)                                                        | In hypothesized direction |
|                              |                                                                                                |                                                                                                                                                                                                                  |                                                                                                                                                    | Likelihood of receiving gemcitabine                                                              | PD = -2.2% (95%CI -3.0%, -1.4%)                                                        | NA (control)              |
| Jacobson, 2011 <sup>33</sup> | Retrospective cohort, 2002-2006<br>Patients with lung cancer (N = 878,923)                     | Decrease in reimbursement for some chemotherapy drugs, following the Medicare Modernization Act<br>Did physicians in different states respond similarly to reimbursement changes, or was there variation?        | Patients diagnosed with lung cancer after a decrease in reimbursement for some chemotherapy drugs, compared to those diagnosed before the decrease | Change in likelihood of receiving chemotherapy within 30 days of diagnosis, within each US state | F-value for null hypothesis that all states' changes are jointly equal to 0 is 38, 279 | In hypothesized direction |
| Colla, 2012 <sup>5,a</sup>   | Retrospective cohort, 2003-2007<br>Cancer patients within the last months of life (N = 57,656) | Decrease in reimbursement for some chemotherapy drugs, following the Medicare Modernization Act<br>Did physicians decrease use of chemotherapy within the last month of life in response to lower reimbursement? | Patients who died from cancer after a decrease in reimbursement for some chemotherapy drugs, compared to those who died before the decrease        | Likelihood of receiving chemotherapy within the last month of life                               | PD = -2.6% (95% CI 4.2%, 1.0%)                                                         | In hypothesized direction |
| Conti, 2012 <sup>34,a</sup>  | Interrupted time series, 2006-2009<br>Use of irinotecan to treat colon cancer (N = NR)         | Expiration of protection of irinotecan and entry of generic version<br>Did physicians decrease use of irinotecan after patient expiration?                                                                       | Patients treated with irinotecan after patent expiration vs. before, compared to number of administrations of oxaliplatin                          | Change in number of administrations of irinotecan, compared to oxaliplatin                       | PD = -17.0% (95%CI -17.1%, 16.9%)                                                      | In hypothesized direction |
|                              |                                                                                                |                                                                                                                                                                                                                  |                                                                                                                                                    | Change in the proportion of patients treated with irinotecan,                                    | PD = -16.5 (95%CI -16.5, -16.5)                                                        | In hypothesized direction |

|                               |                                                                                             |                                                                                                                                                                                                                                                                                                                                                             |                                                                                                                                   |                                                                                                                |                                                                                                                                                               |                           |
|-------------------------------|---------------------------------------------------------------------------------------------|-------------------------------------------------------------------------------------------------------------------------------------------------------------------------------------------------------------------------------------------------------------------------------------------------------------------------------------------------------------|-----------------------------------------------------------------------------------------------------------------------------------|----------------------------------------------------------------------------------------------------------------|---------------------------------------------------------------------------------------------------------------------------------------------------------------|---------------------------|
|                               |                                                                                             |                                                                                                                                                                                                                                                                                                                                                             |                                                                                                                                   | compared to oxaliplatin                                                                                        |                                                                                                                                                               |                           |
| Quek, 2014 <sup>35</sup>      | Retrospective cohort, 2001-2007<br>Patients with prostate cancer (N = 12,255)               | Decrease in reimbursement for ADT following the Medicare Modernization Act, and the response to reimbursement decrease among academic (salaried) and non-academic (fee-for-service) urologists<br>Did non-academic urologists decrease use of ADT in non-indicated settings to a larger degree than academic urologists following a reimbursement decrease? | Patients treated by non-academic urologists after vs. before a decrease in reimbursement for ADT, compared to academic urologists | Likelihood of receiving non-indicated ADT                                                                      | t-statistic for the null hypothesis that the decline in use of non-indicated ADT was the same between non-academic and academic urologists, is -0.07 (p=0.95) | In hypothesized direction |
| Shahinian, 2015 <sup>36</sup> | Retrospective cohort, 2000-2002 and 2004-2007<br>Patients with prostate cancer (N = 27,169) | Decrease in reimbursement for ADT following the Medicare Modernization Act, and the response to reimbursement decrease among academic (salaried) and non-academic (fee-for-service) urologists<br>Did non-academic urologists decrease use of ADT in non-indicated settings to a larger degree than academic urologists following a                         | Patients treated by non-academic urologists after vs. before a decrease in reimbursement for ADT, compared to academic urologists | Likelihood of receiving non-indicated ADT, non-academic vs. academic urologists, before reimbursement decrease | OR = 1.32 (95%CI 1.17, 1.56)                                                                                                                                  | In hypothesized direction |
|                               |                                                                                             |                                                                                                                                                                                                                                                                                                                                                             |                                                                                                                                   | Likelihood of receiving non-indicated ADT, non-academic vs. academic urologists, after reimbursement decrease  | OR = 1.34 (95%CI 1.15, 1.56)                                                                                                                                  | In hypothesized direction |

|                            |                                                                                                                                  |                                                                                                                                                                           |                                                                                                                                                                                                      |                                                                                                                                     |                                            |                                    |
|----------------------------|----------------------------------------------------------------------------------------------------------------------------------|---------------------------------------------------------------------------------------------------------------------------------------------------------------------------|------------------------------------------------------------------------------------------------------------------------------------------------------------------------------------------------------|-------------------------------------------------------------------------------------------------------------------------------------|--------------------------------------------|------------------------------------|
|                            |                                                                                                                                  | reimbursement decrease?                                                                                                                                                   |                                                                                                                                                                                                      | p-value for the null hypothesis that there was no difference in the decline in ADT use between non-academic and academic urologists | p = 0.68                                   | Contrary to hypothesized direction |
| O'Neil, 2016 <sup>37</sup> | Interrupted time series, 2001-2013<br>Patients with bladder cancer, among Medicare beneficiaries (N = approximately 1.2 million) | Increase in reimbursement for office-based cystoscopic procedures<br>Did physicians increase use of office-based cystoscopic procedures after the reimbursement increase? | Patients with bladder cancer treated after vs. before an increase in reimbursement for office-based cystoscopic procedures, compared to patients treated in hospitals or ambulatory surgical centers | Likelihood of receiving an office-based cystoscopic procedure                                                                       | Relative increase: 644% (95%CI 584%, 704%) | In hypothesized direction          |

a: Confidence intervals were derived from the point estimate and standard error presented by the authors.

b. Range of results does not represent a statistical confidence interval, but the variation the estimate across various analytic models.

c: Differences were presented without formal tests of significance, because the study included the entire population of interest rather than a sample.

Abbreviations used: N/A, not applicable; NR, not reported; RR, risk ratio; OR, odds ratio; PD, prevalence difference; RT, radiation therapy; IMRT, intensity modulated radiation therapy; PD, prevalence difference; GI, gastrointestinal; SD, standard deviation; ADT, androgen deprivation therapy.

**eTable 3.** Study Results for Studies With Critical Risk of Bias. “Direction of association between financial incentives and care delivery” describes whether the measured association was in the direction hypothesized by the study authors under the assumption of physician responsiveness to financial incentives (“In hypothesized direction”), or in the direction counter to the hypothesis (“Contrary to hypothesized direction”). NR, not reported; RR, risk ratio; PD, prevalence difference; ADT, androgen deprivation therapy; ESA, erythropoiesis-stimulating agent; RT, radiation therapy;

| Lead author and year of publication | Study setting                                                                                      | Financial incentive studied, and analytic question                                                                                                                              | Exposure and control groups                                                                                                                                                      | Primary outcome[s]                                                            | Result and measure of confidence                                      | Direction of association between financial incentives and care delivery <sup>a</sup> |
|-------------------------------------|----------------------------------------------------------------------------------------------------|---------------------------------------------------------------------------------------------------------------------------------------------------------------------------------|----------------------------------------------------------------------------------------------------------------------------------------------------------------------------------|-------------------------------------------------------------------------------|-----------------------------------------------------------------------|--------------------------------------------------------------------------------------|
| Chang, 2009 <sup>38</sup>           | Retrospective cohort, 2004-2007<br>Patients receiving ADT for prostate cancer (N = NR)             | Decrease in reimbursement for ADT, following the Medicare Modernization Act<br>Did physicians decrease use of ADT in response to lower reimbursement?                           | Patients treated within fee-for-service Medicare after vs. before a decrease in reimbursement for ADT, compared to those treated within the Veterans Affairs health care system. | Total number of claims for ADT across all patients within health care system. | Difference-in-differences, Medicare vs VA = -8.3%                     | In hypothesized direction                                                            |
| Ellis, 2015 <sup>39</sup>           | Retrospective cohort, 2000-2007<br>Patients receiving ADT for prostate cancer (N = 12,943)         | Decrease in reimbursement for ADT, following the Medicare Modernization Act<br>Did physicians decrease use of ADT in non-indicated settings in response to lower reimbursement? | Patients treated after a decrease in reimbursement for ADT, compared to before                                                                                                   | Likelihood of receiving non-indicated ADT                                     | PD = -7.4                                                             | In hypothesized direction                                                            |
| Feinberg, 2014 <sup>40</sup>        | Retrospective cohort, 2010-2012<br>Cancer patients treated within a group of oncology medical home | Oncology practice reimbursement under an “oncology medical home” model<br>Are cancer patients treated under an oncology medical home reimbursement model                        | Patients treated after vs. before practice conversion to an oncology medical home structure, compared to those treated in practices that did not become oncology medical homes   | Change in number of office visit claims                                       | Difference-in-differences, oncology medical home vs not = -0.3 visits | Contrary to hypothesized direction                                                   |

|                            |                                                                                                                                                                                           |                                                                                                                                                                   |                                                         |                                                                                        |                            |                           |
|----------------------------|-------------------------------------------------------------------------------------------------------------------------------------------------------------------------------------------|-------------------------------------------------------------------------------------------------------------------------------------------------------------------|---------------------------------------------------------|----------------------------------------------------------------------------------------|----------------------------|---------------------------|
|                            | practices (N = 12,060)                                                                                                                                                                    | more or less likely to receive chemotherapy, more chemotherapy administrations, more office visits, or generic-only treatment regimens?                           |                                                         |                                                                                        | (measure of confidence NR) |                           |
|                            |                                                                                                                                                                                           |                                                                                                                                                                   |                                                         | Change in number of chemotherapy administrations                                       | NR <sup>b</sup>            | No association            |
|                            |                                                                                                                                                                                           |                                                                                                                                                                   |                                                         | Change in percentage of patients who received chemotherapy                             | NR <sup>b</sup>            | No association            |
|                            |                                                                                                                                                                                           |                                                                                                                                                                   |                                                         | Change in percentage of patients whose treatment regimens contained only generic drugs | NR <sup>b</sup>            | No association            |
| Gawade, 2017 <sup>41</sup> | Retrospective cohort, 2005-2013<br>Patients receiving chemotherapy for breast, colon, lung ovarian, prostate cancer, multiple myeloma, or non-Hodgkin lymphoma (N = 348,012) <sup>c</sup> | Change in Medicare coverage for ESAs<br>Did physicians decrease the use of ESAs after coverage restrictions limited their reimbursement for many cancer patients? | Patients treated after vs. before coverage restrictions | Likelihood of receiving ESA, breast cancer                                             | PD = -50.5                 | In hypothesized direction |
|                            |                                                                                                                                                                                           |                                                                                                                                                                   |                                                         | Likelihood of receiving ESA, colon cancer                                              | PD = -39.1                 | In hypothesized direction |
|                            |                                                                                                                                                                                           |                                                                                                                                                                   |                                                         | Likelihood of receiving ESA, lung cancer                                               | PD = -52.7                 | In hypothesized direction |
|                            |                                                                                                                                                                                           |                                                                                                                                                                   |                                                         | Likelihood of receiving ESA, multiple myeloma                                          | PD = -52.3                 | In hypothesized direction |
|                            |                                                                                                                                                                                           |                                                                                                                                                                   |                                                         | Likelihood of receiving ESA, non-Hodgkin lymphoma                                      | PD = -36.0                 | In hypothesized direction |
|                            |                                                                                                                                                                                           |                                                                                                                                                                   |                                                         | Likelihood of receiving ESA, ovarian cancer                                            | PD = -60.5                 | In hypothesized direction |



|                              |                                                                                                                                                        |                                                                                                                                                                                                                                                        |                                                                  |                                                                                          |                             |                           |
|------------------------------|--------------------------------------------------------------------------------------------------------------------------------------------------------|--------------------------------------------------------------------------------------------------------------------------------------------------------------------------------------------------------------------------------------------------------|------------------------------------------------------------------|------------------------------------------------------------------------------------------|-----------------------------|---------------------------|
|                              |                                                                                                                                                        |                                                                                                                                                                                                                                                        |                                                                  | Likelihood of receiving ESA, prostate cancer                                             | PD = -42.6                  | In hypothesized direction |
| Hershman, 2014 <sup>42</sup> | Retrospective cohort, 2000-2007<br>Patients receiving chemotherapy for breast, colon, lung ovarian, or prostate cancer (N = 121,169)                   | Change in Medicare coverage for ESAs<br>Did physicians decrease the use of ESAs after coverage restrictions limited their reimbursement for many cancer patients?                                                                                      | Patients treated after vs. before coverage restrictions          | Likelihood of receiving ESA                                                              | PD = -8.3                   | In hypothesized direction |
| Hess, 2010 <sup>43</sup>     | Retrospective cohort, 2006-2008<br>Cancer patients (N = 10,389)                                                                                        | Change in Medicare coverage for ESAs<br>Did physicians decrease the use of ESAs after coverage restrictions limited their reimbursement for many cancer patients?                                                                                      | Patients treated after vs. before coverage restrictions          | Change in the proportion of care episodes during which an ESA was given                  | PD = -10.9 (p <0.001)       | In hypothesized direction |
|                              |                                                                                                                                                        |                                                                                                                                                                                                                                                        |                                                                  | Change in the proportion of care episodes during which a transfusion was given           | PD = 1.3 (p = 0.015)        | In hypothesized direction |
| Loy, 2016 <sup>44</sup>      | Retrospective cohort, 2011-2013<br>Patients receiving RT for primary breast, skin, lung, or prostate cancer, or treatment of bone metastasis (N = 984) | Oncology practice reimbursement on a "case based" model rather than fee-for-service<br>Are cancer patients treated with RT under a case based reimbursement model more or less likely to receive a guideline-concordant number of radiation fractions? | Patients treated after vs. before case based payment model began | Likelihood of receiving guideline-concordant number of radiation fractions, all patients | RR = 1.0 (95%CI 0.98, 1.08) | No association            |
|                              |                                                                                                                                                        |                                                                                                                                                                                                                                                        |                                                                  | Likelihood of receiving guideline-concordant number of radiation                         | RR = 1.0 (95%CI 0.94, 1.04) | No association            |

|  |  |  |  |                                                                                             |                                |                                    |
|--|--|--|--|---------------------------------------------------------------------------------------------|--------------------------------|------------------------------------|
|  |  |  |  | fractions, breast cancer                                                                    |                                |                                    |
|  |  |  |  | Likelihood of receiving guideline-concordant number of radiation fractions, lung cancer     | RR = 1.0<br>(95%CI 0.89, 1.09) | No association                     |
|  |  |  |  | Likelihood of receiving guideline-concordant number of radiation fractions, prostate cancer | RR = 1.1<br>(95%CI 1.01, 1.15) | In hypothesized direction          |
|  |  |  |  | Likelihood of receiving guideline-concordant number of radiation fractions, skin cancer     | RR = 0.9<br>(95%CI 0.84, 1.01) | Contrary to hypothesized direction |
|  |  |  |  | Likelihood of receiving guideline-concordant number of radiation fractions, bone metastasis | RR = 2.0<br>(95%CI 1.21, 3.24) | In hypothesized direction          |

a: In cases where estimates were not reported (or derivable), direction of association was determined from authors' stated conclusions.

b: Results were reported graphically, but not numerically

c: Patient number not directly reported; this figure was derived by summing across disease-specific cohorts

**eFigure 1. PRISMA Diagram.**

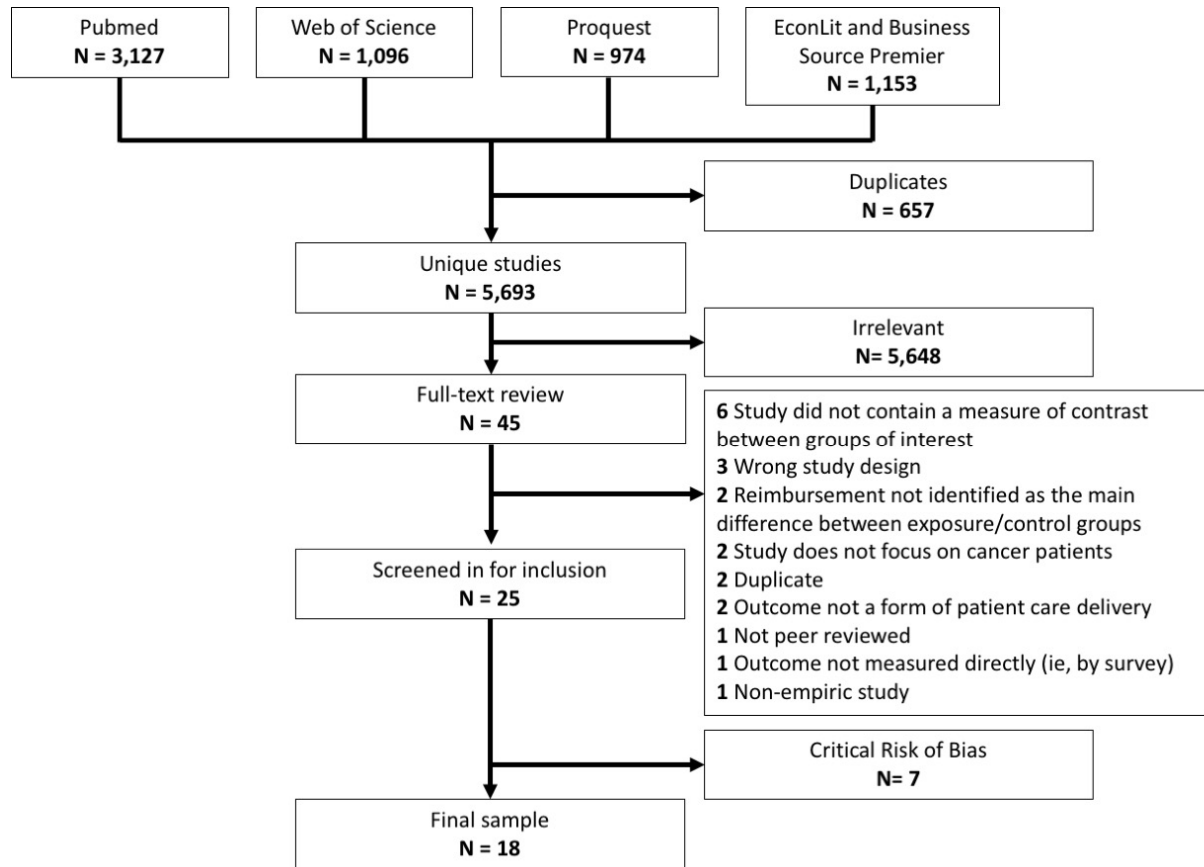

## eFigure 2. Risk of Bias Assessment for Studies With Critical Risk of Bias.

Risk of bias assessment of included studies, performed using ROBINS-I tool. The domains “classification of interventions” and “deviations from intended interventions” were assessed as resulting in low risk of bias for all studies, and are not shown. Blue, low risk of bias; green, moderate risk of bias; yellow, high risk of bias; red, critical risk of bias; grey, unknown risk of bias.

|                | Risk of bias due to confounding | Risk of bias in participant selection | Risk of bias due to missing data | Risk of bias in measurement of outcomes | Risk of bias in selection of reported result | Overall risk of bias | Comment                                                                                                                                                |
|----------------|---------------------------------|---------------------------------------|----------------------------------|-----------------------------------------|----------------------------------------------|----------------------|--------------------------------------------------------------------------------------------------------------------------------------------------------|
| Chang, 2009    | Red                             | Green                                 | Grey                             | Blue                                    | Green                                        | Red                  | Important uncontrolled confounders, no statistically robust analysis                                                                                   |
| Ellis, 2015    | Red                             | Blue                                  | Blue                             | Yellow                                  | Green                                        | Red                  | No appropriate control group to analyze impact of reimbursement                                                                                        |
| Feinberg, 2014 | Yellow                          | Yellow                                | Grey                             | Green                                   | Yellow                                       | Red                  | Important uncontrolled confounders, inadequate control groups, small sample size, high likelihood of selection bias                                    |
| Gawade, 2017   | Red                             | Blue                                  | Blue                             | Green                                   | Blue                                         | Red                  | Important uncontrolled confounders                                                                                                                     |
| Hershman, 2014 | Red                             | Green                                 | Green                            | Green                                   | Green                                        | Red                  | Important uncontrolled confounders                                                                                                                     |
| Hess, 2010     | Red                             | Yellow                                | Grey                             | Green                                   | Blue                                         | Red                  | Important uncontrolled confounders, high likelihood of selection bias                                                                                  |
| Loy, 2016      | Red                             | Yellow                                | Grey                             | Yellow                                  | Yellow                                       | Red                  | Uncontrolled study without adjustment for potential confounders, small sample with lack of detail on selection methods, inappropriate outcome measures |

## eReferences

1. Sterne JA, Hernán MA, Reeves BC, et al. ROBINS-I: a tool for assessing risk of bias in non-randomised studies of interventions. *BMJ*. October 2016:i4919. doi:10.1136/bmj.i4919
2. Ata B, Killaly BL, Olsen TL, Parker RP. On Hospice Operations Under Medicare Reimbursement Policies. *Manag Sci*. 2013;59(5):1027-1044. doi:10.1287/mnsc.1120.1606
3. Bennett CL, Bishop MR, Tallman MS, Somerfield MR, Feinglass J, Smith TJ. The association between physician reimbursement in the US and use of hematopoietic colony stimulating factors as adjunct therapy for older patients with acute myeloid leukemia: results from the 1997 American Society of Clinical Oncology survey. Health Services Research Committee of the American Society of Clinical Oncology. *Ann Oncol Off J Eur Soc Med Oncol*. 1999;10(11):1355-1359.
4. Bennett CL, Stinson TJ. Does reimbursement affect physician decision making? *Cancer Treat Res*. 2000;102:137-149.
5. Colla CH, Morden NE, Skinner JS, Hoverman JR, Meara E. Impact of payment reform on chemotherapy at the end of life. *J Oncol Pract Am Soc Clin Oncol*. 2012;8(3 Suppl):e6s-e13s. doi:10.1200/JOP.2012.000539
6. Ellis S. Declining overuse of hormone therapy for localized prostate cancer: Predictors of reimbursement responsiveness and emerging patterns of care. 2013. [https://sph.unc.edu/files/2015/10/ellis\\_hpm\\_abstract.pdf](https://sph.unc.edu/files/2015/10/ellis_hpm_abstract.pdf). Accessed June 1, 2018.
7. Halpern MT, Fiero MH. Factors Influencing Receipt of Mental Health Services Among Medicaid Beneficiaries With Breast Cancer. *Psychiatr Serv Wash DC*. 2018;69(3):332-337. doi:10.1176/appi.ps.201700024
8. Hemani ML, Makarov DV, Huang WC, Taneja SS. The effect of changes in Medicare reimbursement on the practice of office and hospital-based endoscopic surgery for bladder cancer. *Cancer*. 2010;116(5):1264-1271. doi:10.1002/cncr.24875
9. Herman MG, Mills MD, Gillin MT. Reimbursement versus effort in medical physics practice in radiation oncology. *J Appl Clin Med Phys*. 2003;4(2):179-187. doi:10.1120/1.1566491
10. Makarov DV, Hu EYC, Walter D, et al. Appropriateness of Prostate Cancer Imaging among Veterans in a Delivery System without Incentives for Overutilization. *Health Serv Res*. 2016;51(3):1021-1051. doi:10.1111/1475-6773.12395
11. McKoy JM, Tigue CC, Bennett CL. Does reimbursement affect physicians' decision making? Examples from the use of recombinant erythropoietin. *Cancer Treat Res*. 2008;140:235-251.
12. Millman DS. Reimbursement of freestanding radiation oncology centers. *Adm Radiol AR*. 1989;8(10):49-50.
13. Newcomer LN, Gould B, Page RD, Donelan SA, Perkins M. Changing physician incentives for affordable, quality cancer care: results of an episode payment model. *J Oncol Pract*. 2014;10(5):322-326. doi:10.1200/JOP.2014.001488

14. O'Shaughnessy MJ, Jarosek SL, Virnig BA, Konety BR, Elliott SP. Factors associated with reduction in use of neoadjuvant androgen suppression therapy before radical prostatectomy. *Urology*. 2013;81(4):745-751. doi:10.1016/j.urology.2012.12.044
15. Ramsey SD, Fedorenko C, Chauhan R, et al. Baseline Estimates of Adherence to American Society of Clinical Oncology/American Board of Internal Medicine Choosing Wisely Initiative Among Patients With Cancer Enrolled With a Large Regional Commercial Health Insurer. *J Oncol Pract*. 2015;11(4):338-343. doi:10.1200/JOP.2014.002717
16. Retchin SM. Perioperative Management of Colon Cancer Under Medicare Risk Programs. *Arch Intern Med*. 1997;157(16):1878. doi:10.1001/archinte.1997.00440370126013
17. Shahinian VB, Kaufman SR, Yan P, Herrel LA, Borza T, Hollenbeck BK. Reimbursement and use of intensity-modulated radiation therapy for prostate cancer. *Medicine (Baltimore)*. 2017;96(25):e6929. doi:10.1097/MD.00000000000006929
18. Shen X, Showalter TN, Mishra MV, et al. Radiation oncology services in the modern era: evolving patterns of usage and payments in the office setting for medicare patients from 2000 to 2010. *J Oncol Pract*. 2014;10(4):e201-207. doi:10.1200/JOP.2013.001270
19. Soumerai SB, Ross-Degnan D, Gortmaker S, Avorn J. Withdrawing payment for nonscientific drug therapy. Intended and unexpected effects of a large-scale natural experiment. *JAMA*. 1990;263(6):831-839.
20. Jacobson M, O'Malley AJ, Earle CC, Pakes J, Gaccione P, Newhouse JP. Does reimbursement influence chemotherapy treatment for cancer patients? *Health Aff Proj Hope*. 2006;25(2):437-443. doi:10.1377/hlthaff.25.2.437
21. Weight CJ, Klein EA, Jones JS. Androgen deprivation falls as orchiectomy rates rise after changes in reimbursement in the U.S. Medicare population. *Cancer*. 2008;112(10):2195-2201. doi:10.1002/cncr.23421
22. Hadley J, Mandelblatt JS, Mitchell JM, et al. Medicare breast surgery fees and treatment received by older women with localized breast cancer. *Health Serv Res*. 2003;38(2):553-573.
23. Epstein AJ, Johnson SJ. Physician response to financial incentives when choosing drugs to treat breast cancer. *Int J Health Care Finance Econ*. 2012;12(4):285-302. doi:10.1007/s10754-012-9117-y
24. Ellis SD, Chen RC, Dusetzina SB, et al. Are Small Reimbursement Changes Enough to Change Cancer Care? Reimbursement Variation in Prostate Cancer Treatment. *J Oncol Pract*. 2016;12(4):e423-436. doi:10.1200/JOP.2015.007344
25. Jung J, Xu WY, Kalidindi Y. Impact of the 340B Drug Pricing Program on Cancer Care Site and Spending in Medicare. *Health Serv Res*. January 2018. doi:10.1111/1475-6773.12823
26. Mitchell JM, Sunshine JH. Consequences of physicians' ownership of health care facilities--joint ventures in radiation therapy. *N Engl J Med*. 1992;327(21):1497-1501. doi:10.1056/NEJM199211193272106

27. Smith BD, Pan I-W, Shih Y-CT, et al. Adoption of intensity-modulated radiation therapy for breast cancer in the United States. *J Natl Cancer Inst.* 2011;103(10):798-809. doi:10.1093/jnci/djr100
28. Bekelman JE, Suneja G, Guzzo T, Pollack CE, Armstrong K, Epstein AJ. Effect of practice integration between urologists and radiation oncologists on prostate cancer treatment patterns. *J Urol.* 2013;190(1):97-101. doi:10.1016/j.juro.2013.01.103
29. Mitchell JM. Urologists' use of intensity-modulated radiation therapy for prostate cancer. *N Engl J Med.* 2013;369(17):1629-1637. doi:10.1056/NEJMsa1201141
30. Williams SB, Huo J, Chapin BF, Smith BD, Hoffman KE. Impact of urologists' ownership of radiation equipment in the treatment of prostate cancer. *Prostate Cancer Prostatic Dis.* 2017;20(3):300-304. doi:10.1038/pcan.2017.9
31. Elliott SP, Jarosek SL, Wilt TJ, Virnig BA. Reduction in physician reimbursement and use of hormone therapy in prostate cancer. *J Natl Cancer Inst.* 2010;102(24):1826-1834. doi:10.1093/jnci/djq417
32. Jacobson M, Earle CC, Price M, Newhouse JP. How Medicare's payment cuts for cancer chemotherapy drugs changed patterns of treatment. *Health Aff Proj Hope.* 2010;29(7):1391-1399. doi:10.1377/hlthaff.2009.0563
33. Jacobson M, Earle CC, Newhouse JP. Geographic variation in physicians' responses to a reimbursement change. *N Engl J Med.* 2011;365(22):2049-2052. doi:10.1056/NEJMp1110117
34. Conti RM, Rosenthal MB, Polite BN, Bach PB, Shih Y-CT. Infused chemotherapy use in the elderly after patent expiration. *J Oncol Pract.* 2012;8(3 Suppl):e18s-23s. doi:10.1200/JOP.2012.000541
35. Quek RGW, Master VA, Portier KM, et al. Association of reimbursement policy and urologists' characteristics with the use of medical androgen deprivation therapy for clinically localized prostate cancer. *Urol Oncol.* 2014;32(6):748-760. doi:10.1016/j.urolonc.2014.02.017
36. Shahinian VB, Kuo Y-F. Reimbursement cuts and changes in urologist use of androgen deprivation therapy for prostate cancer. *BMC Urol.* 2015;15:25. doi:10.1186/s12894-015-0020-y
37. O'Neil B, Graves AJ, Barocas DA, Chang SS, Penson DF, Resnick MJ. Doing More for More: Unintended Consequences of Financial Incentives for Oncology Specialty Care. *J Natl Cancer Inst.* 2016;108(2). doi:10.1093/jnci/djv331
38. Chang SL, Liao JC, Shinghal R. Decreasing use of luteinizing hormone-releasing hormone agonists in the United States is Independent of Reimbursement Changes: A Medicare and Veterans Health Administration claims analysis. *J Urol.* 2009;182(1):255-260; discussion 261. doi:10.1016/j.juro.2009.02.141
39. Ellis SD, Nielsen ME, Carpenter WR, et al. Gonadotropin-releasing hormone agonist overuse: urologists' response to reimbursement and characteristics associated with persistent overuse. *Prostate Cancer Prostatic Dis.* 2015;18(2):173-181. doi:10.1038/pcan.2015.10
40. Feinberg B, Milligan S, Olson T, et al. Physician behavior impact when revenue shifted from drugs to services. *Am J Manag Care.* 2014;20(4):303-310.

41. Gawade PL, Berlin JA, Henry DH, et al. Changes in the use of erythropoiesis-stimulating agents (ESAs) and red blood cell transfusion in patients with cancer amidst regulatory and reimbursement changes. *Pharmacoepidemiol Drug Saf.* 2017;26(11):1357-1366. doi:10.1002/pds.4293
42. Hershman DL, Neugut AI, Shim JJ, Glied S, Tsai W-Y, Wright JD. Erythropoiesis-stimulating agent use after changes in medicare reimbursement policies. *J Oncol Pract.* 2014;10(4):264-269. doi:10.1200/JOP.2013.001255
43. Hess G, Nordyke RJ, Hill J, Hulnick S. Effect of reimbursement changes on erythropoiesis-stimulating agent utilization and transfusions. *Am J Hematol.* 2010;85(11):838-843. doi:10.1002/ajh.21837
44. Loy BA, Shkedy CI, Powell AC, et al. Do Case Rates Affect Physicians' Clinical Practice in Radiation Oncology?: An Observational Study. *PloS One.* 2016;11(2):e0149449. doi:10.1371/journal.pone.0149449
